# Supplementary material for: A self-supported SS-fiber@meso-HZSM-5 core–shell catalyst via caramel-assistant synthesis toward prolonged lifetime for the methanol-to-propylene reaction
Source: Royal Society of Chemistry journal article supplement (doi:10.1039/c6ra08944e), 2016-01-01
Supplement: c6ra08944e1.pdf [file c6ra08944e1.pdf]

## Electronic Supplementary information (ESI)

### **Self-supported SS-fiber@meso-HZSM-5 core-shell catalyst via caramel-assistant synthesis toward prolonged lifetime for methanol-to-propylene reaction**

Jia Ding, Zhiqiang Zhang, Lupeng Han, Chunzheng Wang, Pengjing Chen, Guofeng Zhao\*, Ye Liu and Yong Lu\*

*Shanghai Key Laboratory of Green Chemistry and Chemical Processes, School of Chemistry and Molecular Engineering, East China Normal University, Shanghai 200062, China.*

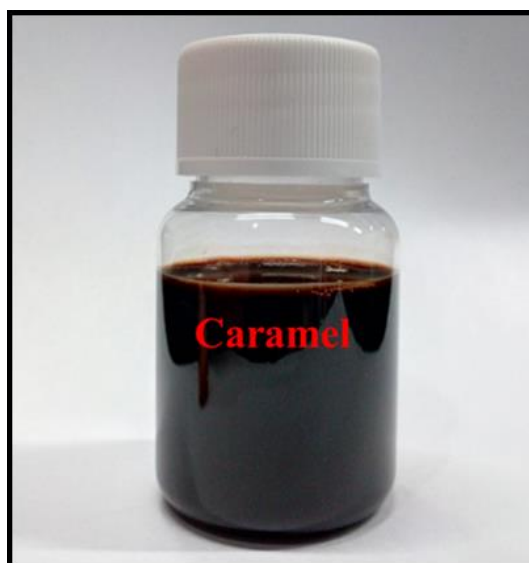

**Fig. S1** Photograph of the caramel solution with caramelization time of 3 h.

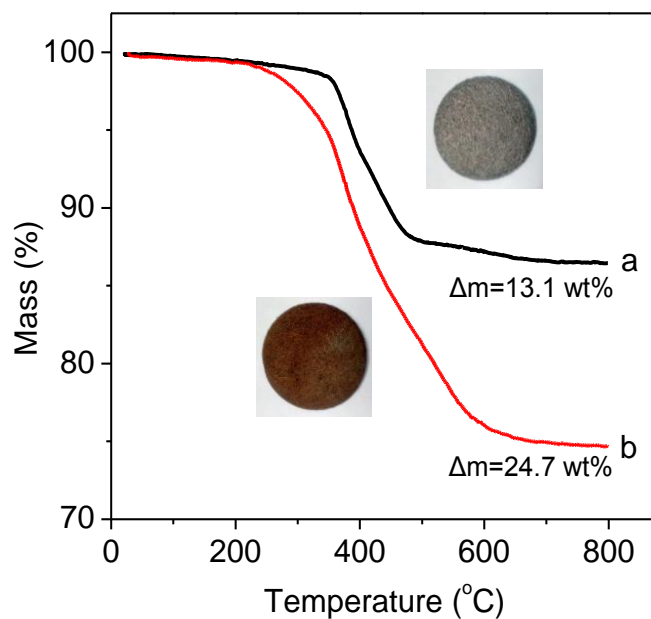

**Fig. S2** TGA profiles of shell in the as-synthesized catalysts. (a) SS-fiber@HZSM-5 synthesized with the absence of caramel and without calcination treatment, (b) SS-fiber@HZSM-5(3 h, 1.8) synthesized in the presence of caramel and without calcination treatment. The weight loss of sample (a) was assigned to decomposition of TPA<sup>+</sup>, and the larger weight loss of sample (b) was due to the decomposition of TPA<sup>+</sup> as well as caramel.

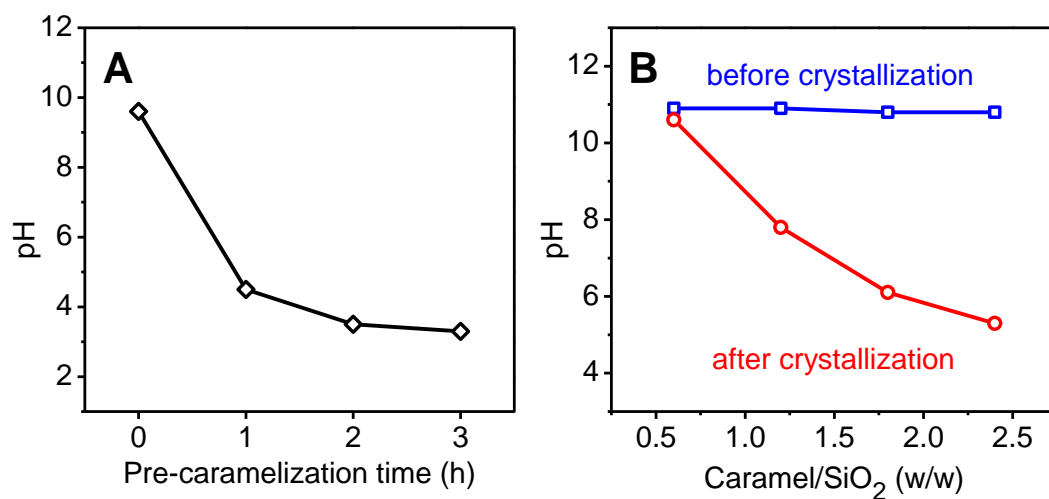

**Fig. S3** (A) pH values of the caramel solution (10 wt%) at different pre-caramelization time; (B) pH values of the synthesis sol before and after crystallization with different caramel/SiO<sub>2</sub> mass ratio (pre-caramelization time of 3 h), suggesting caramel is a slow release acid and will be further caramelized during hydrothermal synthesis.

**Table S1** Textural properties of the shell in SS-fiber@meso-HZSM-5 catalysts with different pre-caramelization times<sup>a</sup>.

| Sample                         | S <sub>BET</sub><br>(m <sup>2</sup> g <sup>-1</sup> ) | S <sub>micro</sub><br>(m <sup>2</sup> g <sup>-1</sup> ) | S <sub>external</sub><br>(m <sup>2</sup> g <sup>-1</sup> ) | V <sub>micro</sub><br>(cm <sup>3</sup> g <sup>-1</sup> ) | V <sub>total</sub><br>(cm <sup>3</sup> g <sup>-1</sup> ) | V <sub>meso</sub><br>(cm <sup>3</sup> g <sup>-1</sup> ) |
|--------------------------------|-------------------------------------------------------|---------------------------------------------------------|------------------------------------------------------------|----------------------------------------------------------|----------------------------------------------------------|---------------------------------------------------------|
| SS-fiber@meso-HZSM-5(0 h, 0.6) | 352                                                   | 334                                                     | 17                                                         | 0.15                                                     | 0.18                                                     | 0.03                                                    |
| SS-fiber@meso-HZSM-5(1 h, 0.6) | 367                                                   | 349                                                     | 18                                                         | 0.16                                                     | 0.19                                                     | 0.03                                                    |
| SS-fiber@meso-HZSM-5(2 h, 0.6) | 399                                                   | 380                                                     | 19                                                         | 0.18                                                     | 0.21                                                     | 0.04                                                    |
| SS-fiber@meso-HZSM-5(3 h, 0.6) | 363                                                   | 340                                                     | 23                                                         | 0.16                                                     | 0.20                                                     | 0.04                                                    |

<sup>a</sup> Data calculated excluding the weight of SS-fiber.

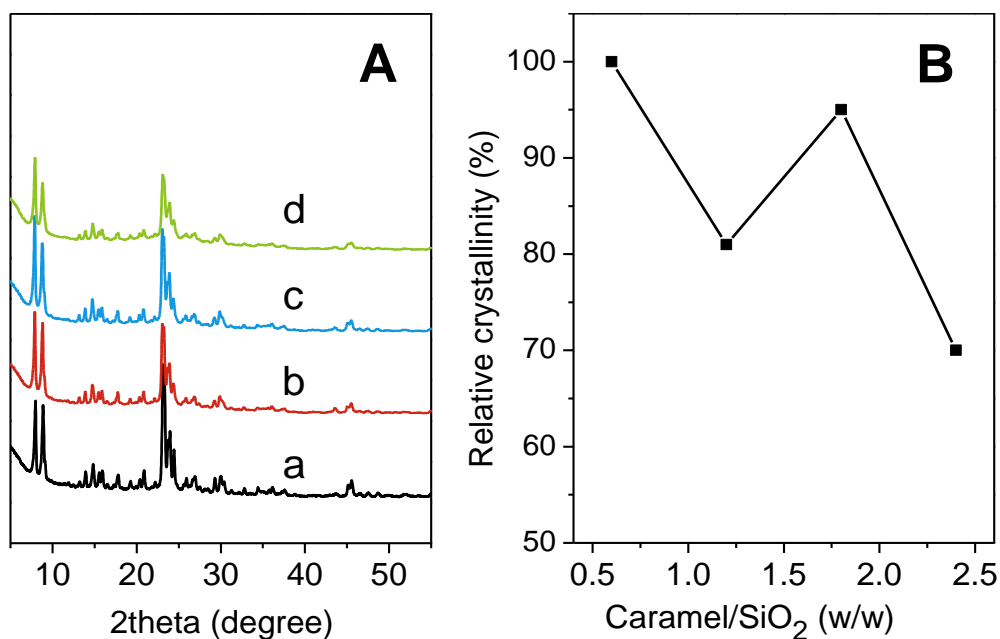

**Fig. S4** (A) XRD patterns of powdered ZSM-5 from SS-fiber@meso-HZSM-5 catalysts synthesized with different caramel/SiO<sub>2</sub> mass ratios. To avoid any effect on the calculation of relative crystallinity, such as zeolite content and slight nonuniformity of shell, the composite samples were crashed to destroy the robust core-shell structure to obtain the powdered ZSM-5; (B) Relative crystallinity vs. caramel/SiO<sub>2</sub> mass ratio based on the XRD patterns of powdered ZSM-5; (a) SS-fiber@meso-HZSM-5(3 h, 0.6), (b) SS-fiber@meso-HZSM-5(3 h, 1.2), (c) SS-fiber@meso-HZSM-5(3 h, 1.8), (d) SS-fiber@meso-HZSM-5(3 h, 2.4).

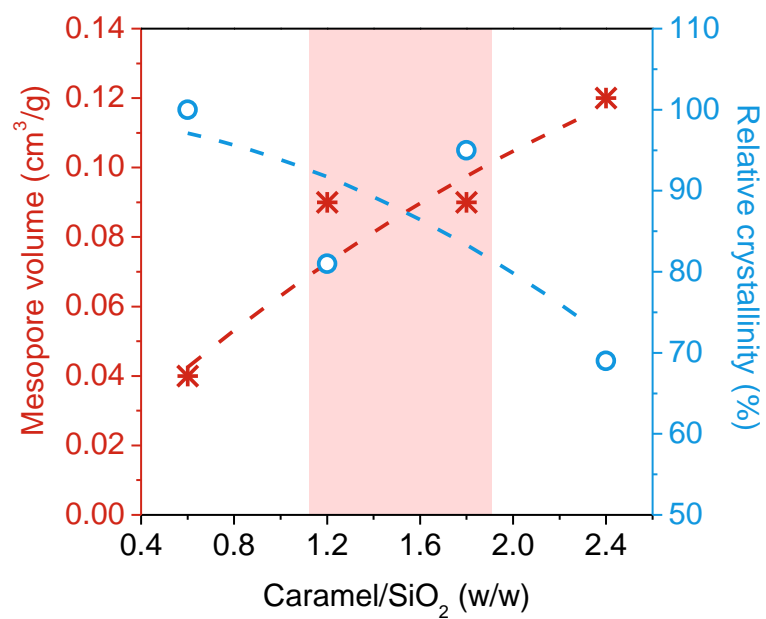

**Fig. S5** Mesopore volume and relative crystallinity as a function of caramel/SiO<sub>2</sub> mass ratio.

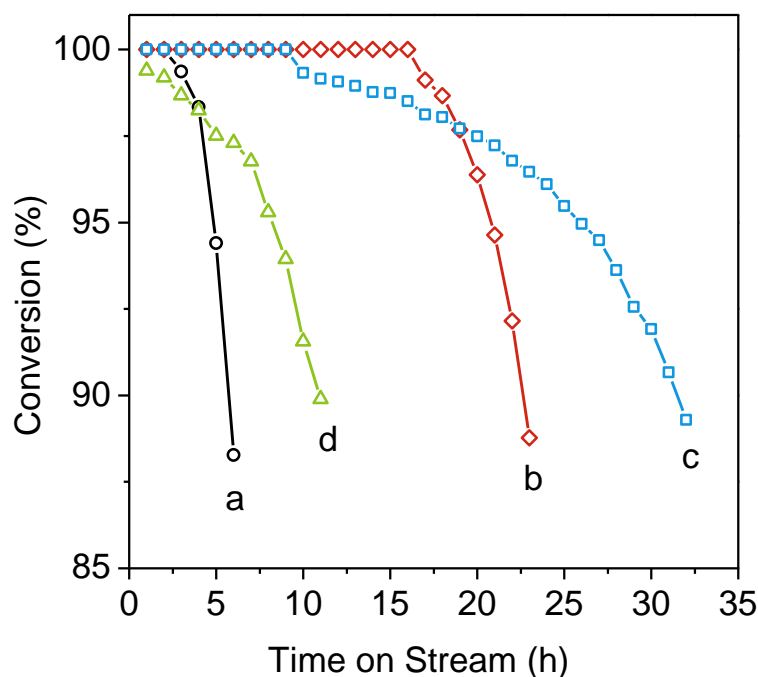

**Fig. S6** Methanol conversion as a function of time on stream (TOS) over the SS-fiber@meso-HZSM-5 core-shell catalysts of (a) SS-fiber@meso-HZSM-5(3 h, 0.6), (b) SS-fiber@meso-HZSM-5(3 h, 1.2), (c) SS-fiber@meso-HZSM-5(3 h, 1.8), (d) SS-fiber@meso-HZSM-5(3 h, 2.4). Reaction conditions: 450 °C, WHSV=10 h<sup>-1</sup>, 0.1 MPa, 30 vol% methanol in N<sub>2</sub>, zeolite 0.4 g. Testing was quitted at ~90% conversion.

Although SS-fiber@meso-HZSM-5(3 h, 1.8) exhibited a longer lifetime compared to SS-fiber@meso-HZSM-5(3 h, 1.2), it was noticed that SS-fiber@meso-HZSM-5(3 h, 1.2) delivered higher methanol conversion during TOS of 10-18 h. Such observation was most likely due to the more Brönsted acid amount and less framework defects of SS-fiber@meso-HZSM-5(3 h, 1.2).

On the other hand, SS-fiber@meso-HZSM-5(3 h, 2.4) delivered a single-run lifetime of only 10 h, and showed a comparable SiO<sub>2</sub>/Al<sub>2</sub>O<sub>3</sub> molar ratio as well as Al content in zeolite shell with SS-fiber@meso-HZSM-5(3 h, 1.8). However, it should be noted that as active sites, Brönsted acid amount was decreased by 34% (0.024 mmol/g). Considering that the smaller change of WSHV will make a big difference in stability, we believe that lower crystallinity and ultra-low Brönsted acid amount accounted for the shortened lifetime of SS-fiber@meso-HZSM-5(3 h, 2.4).
